# Supplementary material for: Design and synthesis of a 3D graphene-enhanced electrode for fast charge/ion transport for lithium storage
Source: Royal Society of Chemistry journal article supplement (doi:10.1039/d2nj04012c), 2022-01-01
Supplement: d2nj04012c1.pdf [file d2nj04012c1.pdf]

## Supporting Information

# Design and Synthesis of 3D Graphene-Based Electrode for Fast Charge/Ion Transport for Lithium Storage

Xing Yuan<sup>1,2</sup>, Shahrman Zainal Abidin<sup>1\*</sup>, Oskar Hasdinor Hassan<sup>1</sup>, and Xiaojun Zhao<sup>3\*</sup>

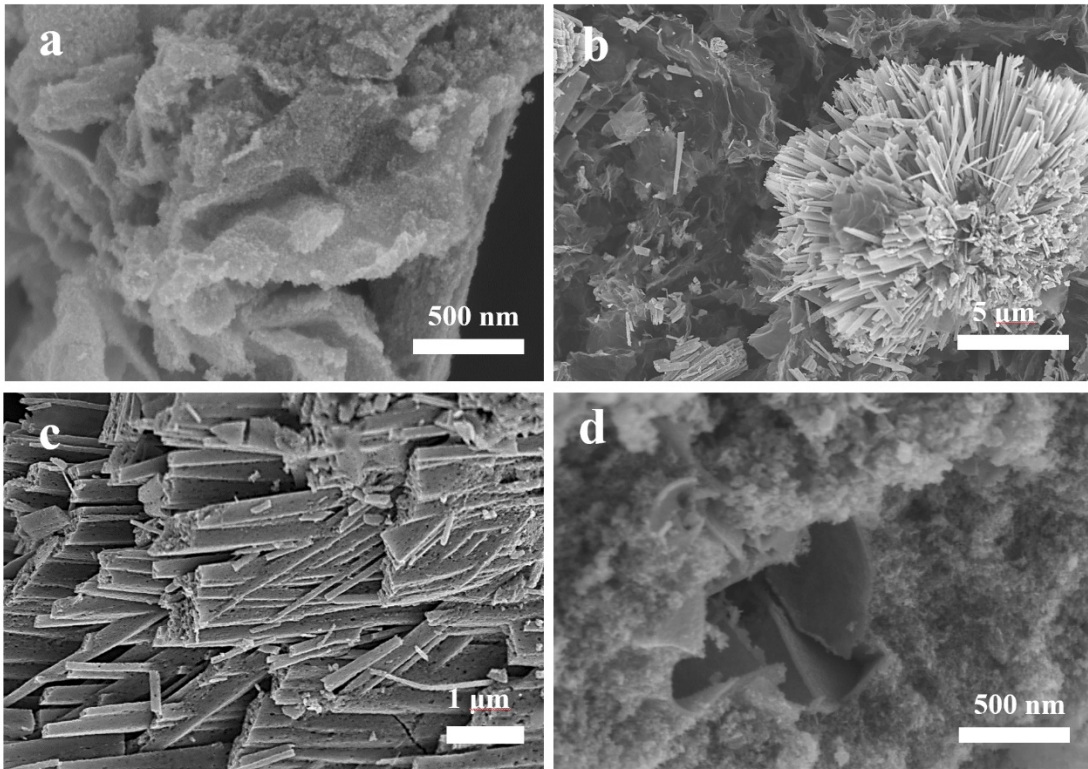

**Figure S1** SEM images of (a) SnO<sub>2</sub>-NG, (b, c) ZnO-NG, and (d) SnO<sub>2</sub>/ZnO, respectively.

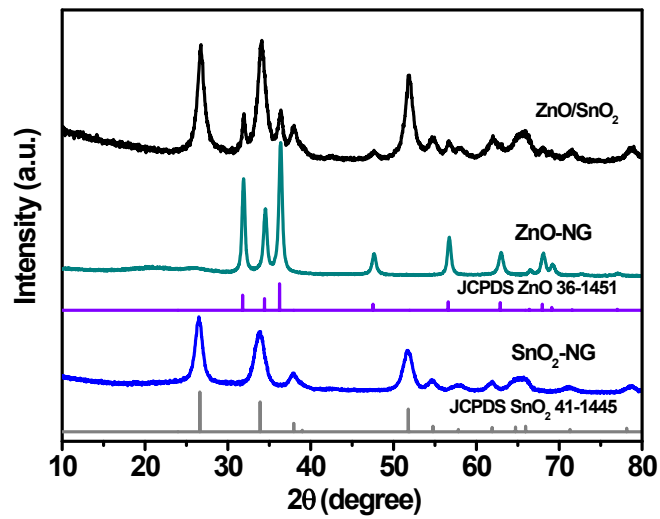

**Figure S2** XRD patterns curves of SnO<sub>2</sub>-NG, ZnO-NG, and SnO<sub>2</sub>/ZnO.

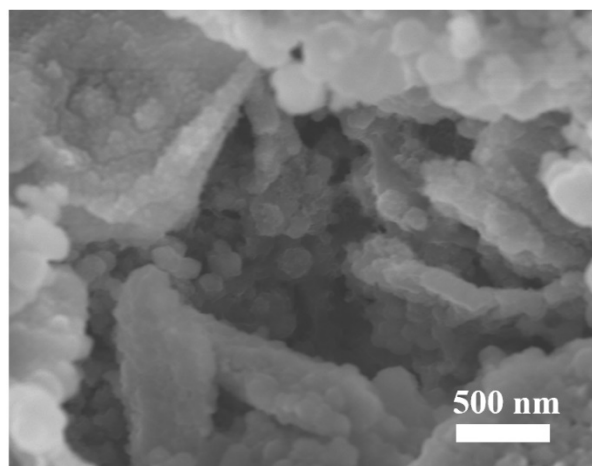

Figure S3 The post-mortem SEM image of the SnO<sub>2</sub>/Zn<sub>2</sub>SnO<sub>4</sub>-NG composite after long-term at 1 A g<sup>-1</sup>.

| Anode materials                                        | Rate capability (mAh g <sup>-1</sup> )/current density (A g <sup>-1</sup> ) | Reference                                               |
|--------------------------------------------------------|-----------------------------------------------------------------------------|---------------------------------------------------------|
| SnO <sub>2</sub> /Zn <sub>2</sub> SnO <sub>4</sub> -NG | 495/5                                                                       | <b>This work</b>                                        |
| Sn/SnO <sub>x</sub> /ZnO-1@N-CNF                       | 356.8/5                                                                     | <i>J. Alloys. Compd.</i> 2020, 819, 153036              |
| SnO <sub>2</sub> @SnS <sub>2</sub> @NG                 | 343/5                                                                       | <i>Energy Storage Materials</i> 2019, 20, 335–333       |
| MOF/SnO <sub>2</sub> /Graphene                         | 324/2                                                                       | <i>Nano Energy</i> , 2020, 74, 104868                   |
| SnO <sub>2-x</sub> /N-rGO                              | 371/5                                                                       | <i>Nanoscale</i> 2018, 10, 11460–11466                  |
| SnO <sub>2</sub> @SnS <sub>2</sub> @rGO                | 436/2                                                                       | <i>ACS Appl. Mater. Interfaces</i> 2015, 7, 22522–22531 |
| SnO <sub>2</sub> @C@Co-NC                              | 29.6/5                                                                      | <i>Chem. Eur. J.</i> 2020, 26, 12882–12890              |
| Zn <sub>2</sub> SnO <sub>4</sub> @V@PC                 | 504/2                                                                       | <i>J. Alloys. Compd.</i> 2022, 910, 164924              |
| Zn <sub>2</sub> SnO <sub>4</sub> /NC                   | 306.0/2.4                                                                   | <i>J. Alloys. Compd.</i> 2019, 786, 346-355             |
| Zn <sub>2</sub> SnO <sub>4</sub> /graphene             | 372/1                                                                       | <i>J. Power Sources</i> 2015, 281, 341-349              |
| LC@Zn <sub>2</sub> SnO <sub>4</sub> @MnO/C             | 400.5/2                                                                     | <i>CrystEngComm</i> , 2021, 23, 2590                    |
| Nano-SnO <sub>2</sub> /G,<br>Nano-Sn/G@C               | 94/2,<br>117/2                                                              | <i>Chem. Eng. J.</i> 2022, 450, 138113                  |
| SnO <sub>2</sub> @ZnCo <sub>2</sub> O <sub>4</sub> @C  | 496/1                                                                       | <i>Applied Surface Sci.</i> 2022, 591, 153220           |
